# Supplementary material for: MS785-MS27, a Commercially Available Antibody Cocktail against Misfolded SOD1, Recognizes Various Conformation-disordered SOD1 Species Lacking the Incorporated Zn ion
Source: Preprints.org preprint supplement (doi:10.20944/preprints202404.0459.v1), 2024-04-08
Supplement: Supplementary file 1 [file supplementary]

**Figure S1 Recognition of G37R SOD1 by MS785 or MS27 alone**

Indirect ELISA with (*left*) MS785 alone, (*middle*) MS27 alone, and (*right*) the MS785-MS27 cocktail for apo-G37R SOD1SH. Apo-WT SOD1SH was used as a positive control for each antibody. Data are given as the mean ± SD (n = 4 per group).

**Figure S2 Recognition of murine SOD1 species by MS785-MS27 antibody cocktail**

(**A**) A representative image showing Instant Blue Coomassie staining with murine WT SOD1 proteins. For analysis of SOD1 with a disulfide bond, the protein at 10 mM was treated with 40 mM iodoacetamide at 37ºC for 1 h and subjected to SDS-PAGE under non-reducing conditions. SH = disulfide bond-cleaved SOD1; S-S = disulfide bond-formed SOD1. Indirect ELISA with (**B**) the MS785-MS27 cocktail and (**C**) MS27 alone for murine SOD1. Human apo-WT SOD1SH was used as an internal control. Data are given as the mean ± SD (n = 4 per group). (**D**) Comparisons of the amino acid sequences between murine SOD1 and human SOD1 in the epitope regions of MS785 and MS27.
